# Supplementary material for: Polymer Coated Oncolytic Adenovirus to Selectively Target Hepatocellular Carcinoma Cells
Source: MDPI journal article supplement (doi:10.3390/pharmaceutics13070949), 2021-06-24
Supplement: s1 [file s1]

# Supplementary Materials: Polymer Coated Oncolytic Adenovirus to Selectively Target Hepatocellular Carcinoma Cells

Mariangela Garofalo, Federica Bellato, Salvatore Magliocca, Alessio Malfanti, Lukasz Kuryk, Beate Rinner, Samuele Negro, Stefano Salmaso, Paolo Caliceti, Francesca Mastrotto

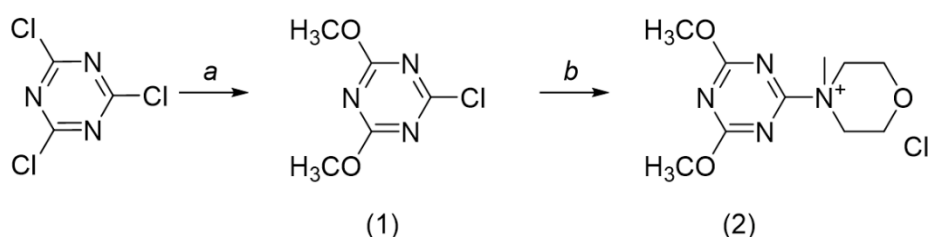

**Scheme S1.** Synthesis of CDMT (1) intermediate and DMTMM (2). *Reagent and conditions:* (a) MeOH, milliQ water, Na<sub>2</sub>CO<sub>3</sub>, from 0 to 35 °C, 12 h; (b) N-methylmorpholine, THF, room temperature, 30 min.

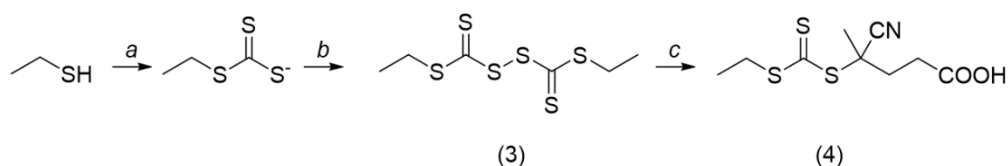

**Scheme S2.** Synthesis of bis(ethylsulfanylthiocarbonyl)disulfide (3) intermediate and 4-cyano-4-(ethylsulfanylthiocarbonylsulfanyl)pentanoic acid (4). *Reagents and conditions:* (a) CS<sub>2</sub>, NaOH, water:acetone 4:1, 0 °C, 1 h; (b) K<sub>3</sub>[Fe(CN)<sub>6</sub>]; (c) 4,4'-azobis(cyanopentanoic acid), EtOH, 60 °C, 16 h.

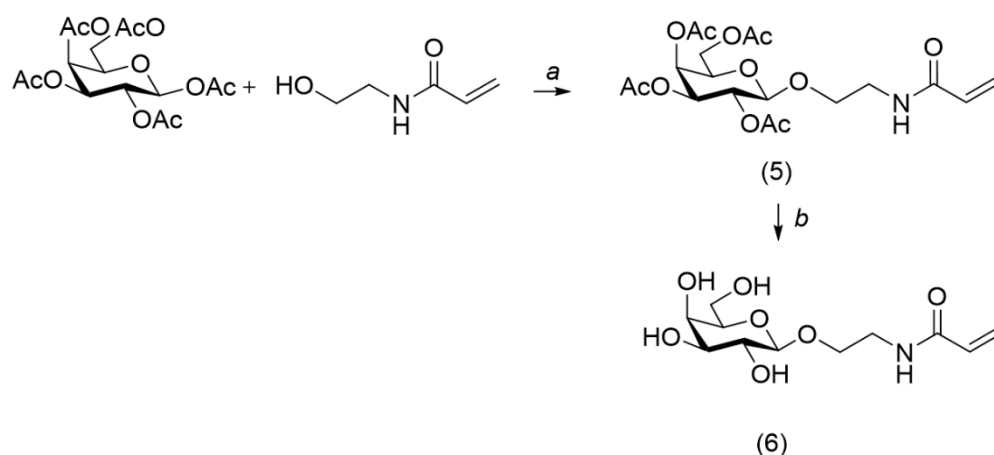

**Scheme S3.** Synthesis of 2,3,4,6-O-tetraacetyl-D-galactopyranosyloxyethyl acrylamide (5) and its deprotection to yield D-galactopyranosyloxyethyl acrylamide (6). *Reagents and conditions:* (i) BF<sub>3</sub>Et<sub>2</sub>O, CH<sub>2</sub>Cl<sub>2</sub>, 0 °C; (ii) KOH, CH<sub>3</sub>OH.

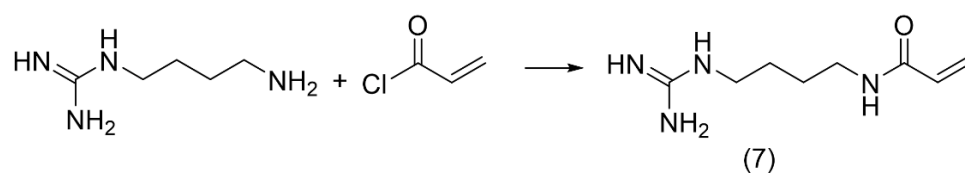

**Scheme S4.** Synthesis of agmatine acrylamide (7). *Reagents and conditions:*  $K_2CO_3$ , NaOH, 0 °C, 16 h.

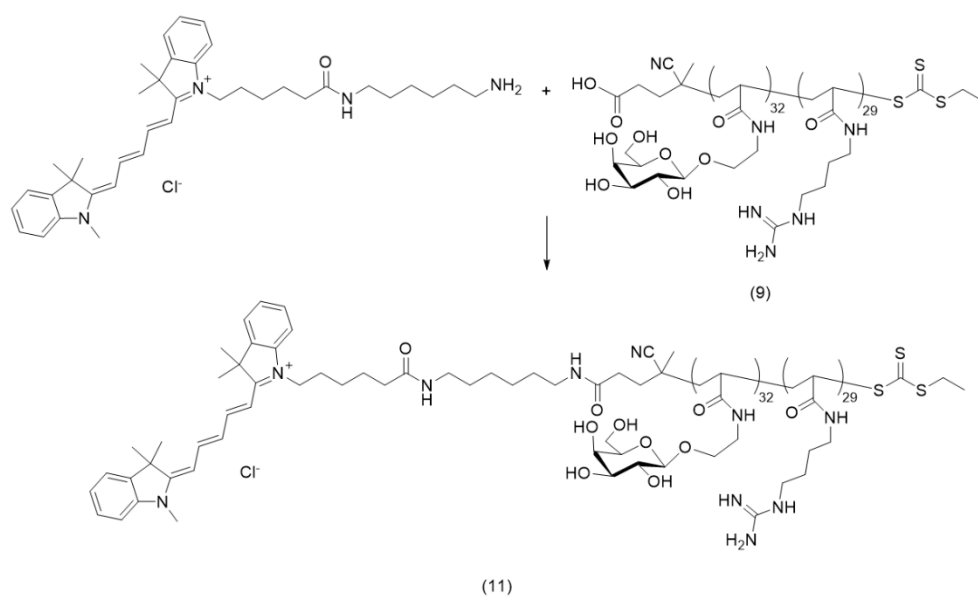

**Scheme S5.** Synthesis of Cy5-Gal<sub>32</sub>-b-Agm<sub>29</sub> (11) by coupling reaction of Cy5-NH<sub>2</sub> with Gal<sub>32</sub>-b-Agm<sub>29</sub> copolymer. *Reagent and conditions:* DMTMM, 50 mM MES pH 6.8, room temperature, 16 h.

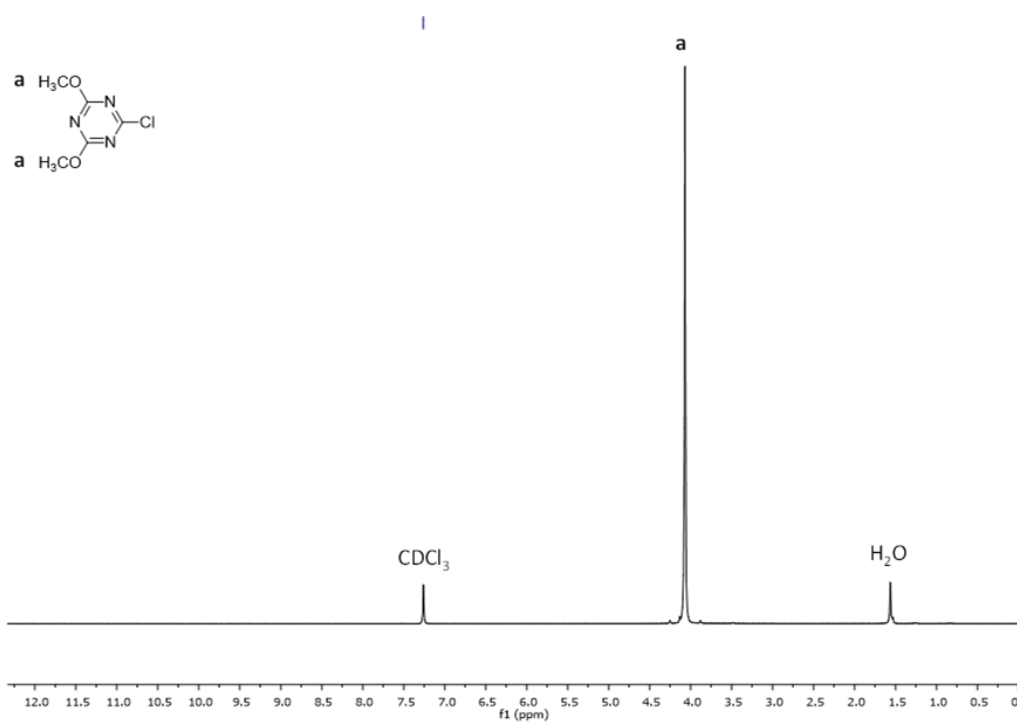

**Figure S1.**  $^1H$  NMR of CDMT (1) in  $CDCl_3$ .

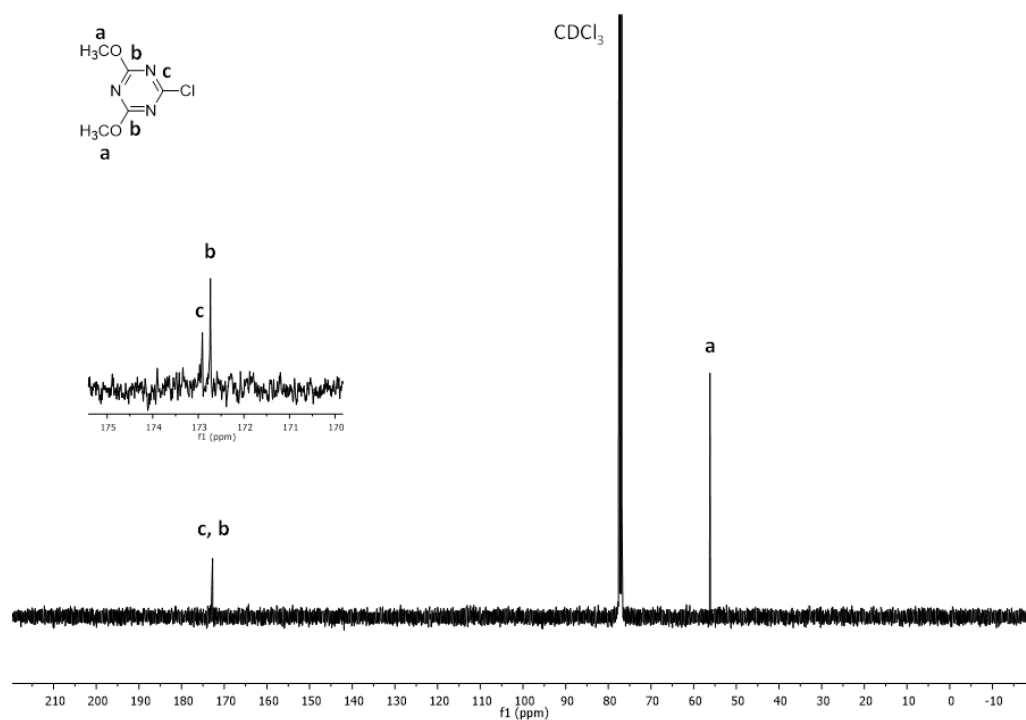

Figure S2. <sup>13</sup>C NMR of CDMT (2) in CDCl<sub>3</sub>.

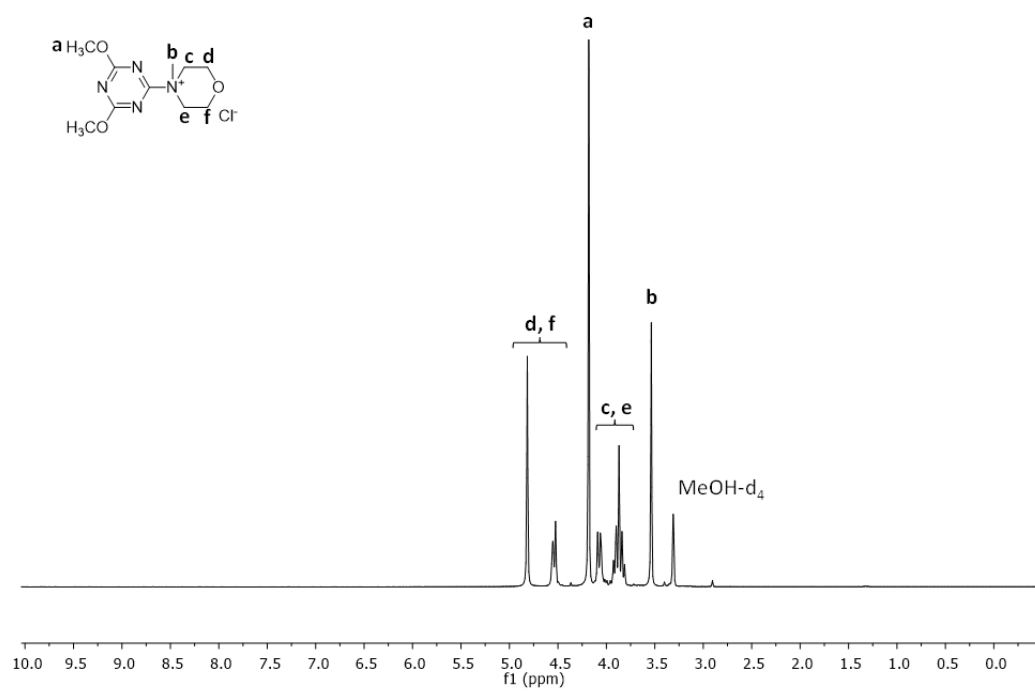

Figure S3. <sup>1</sup>H NMR of DMTMM (2) in MeOH-*d*<sub>4</sub>.

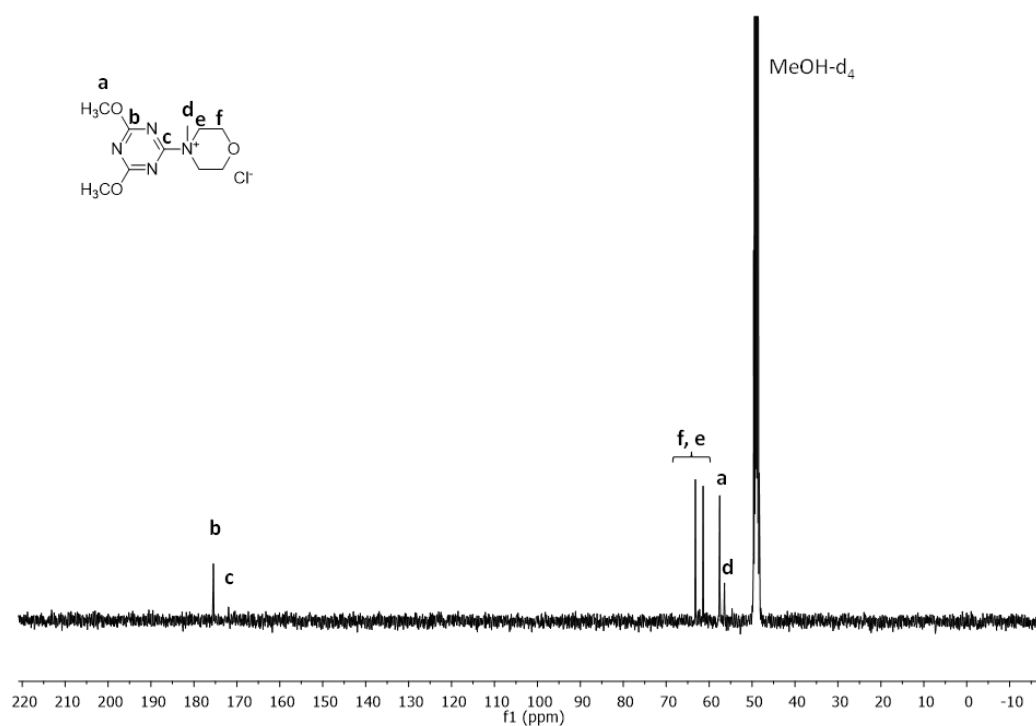

Figure S4. <sup>13</sup>C NMR of DMTMM (2) in MeOH-*d*<sub>4</sub>.

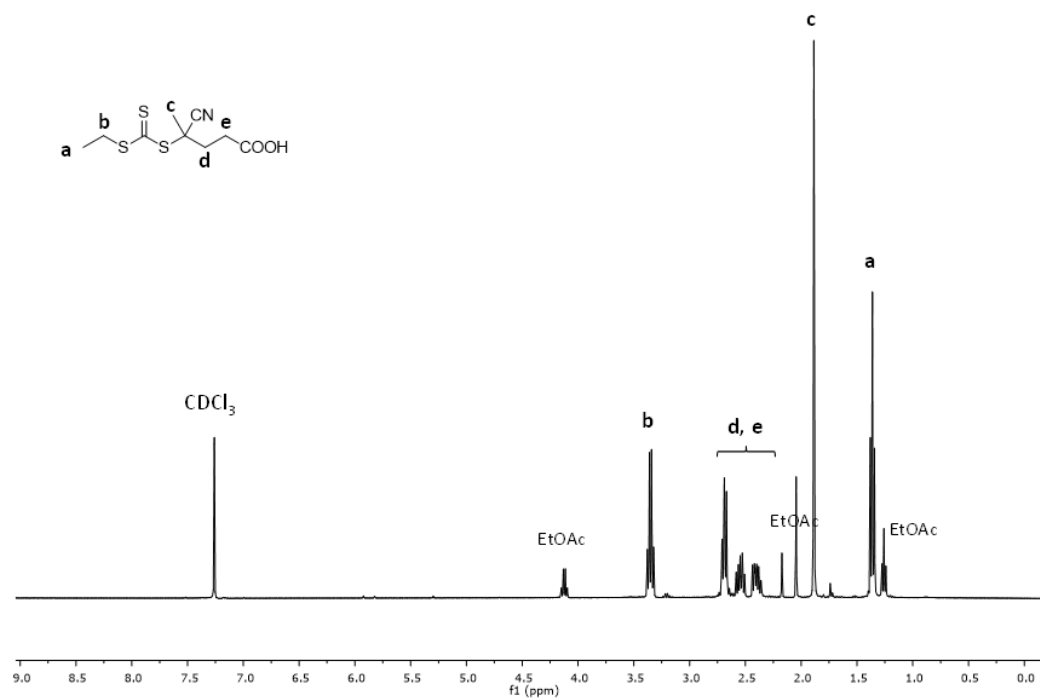

Figure S5. <sup>1</sup>H NMR in CDCl<sub>3</sub> of purified 4-cyano-4(ethylsulfanylthiocarbonylsulfanyl)pentanoic acid (4).

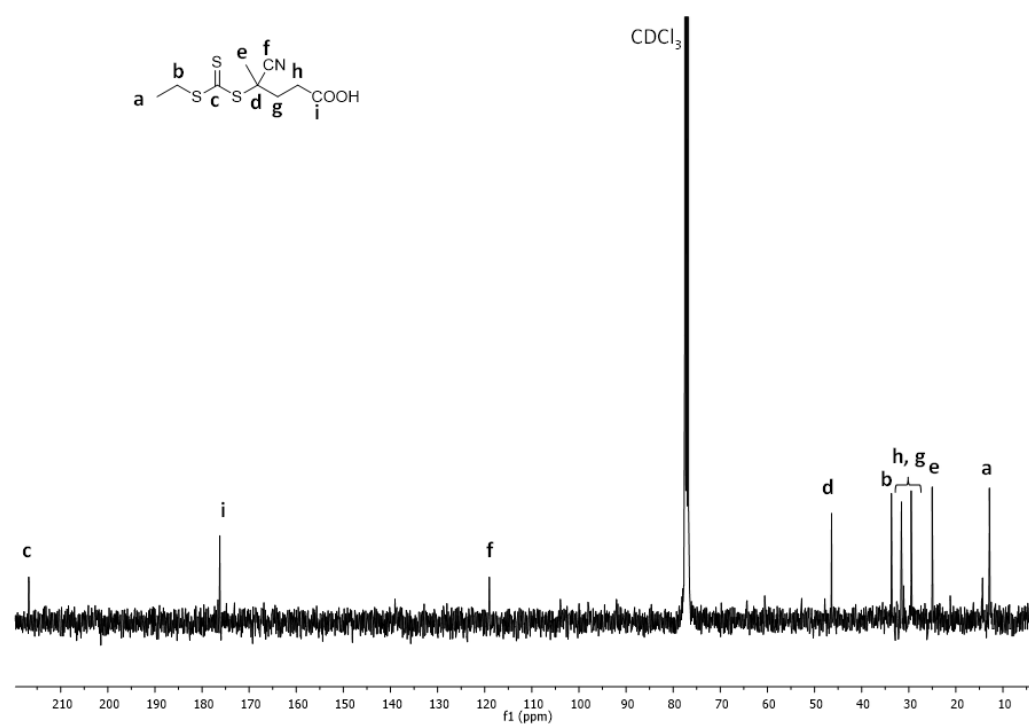

**Figure S6.** <sup>13</sup>C NMR in CDCl<sub>3</sub> of purified 4-cyano-4(ethylsulfanylthiocarbonylsulfanyl)pentanoic acid (4). \*Signals at 14.34, 21.19, 60.58 ppm were due to EtOAc traces.

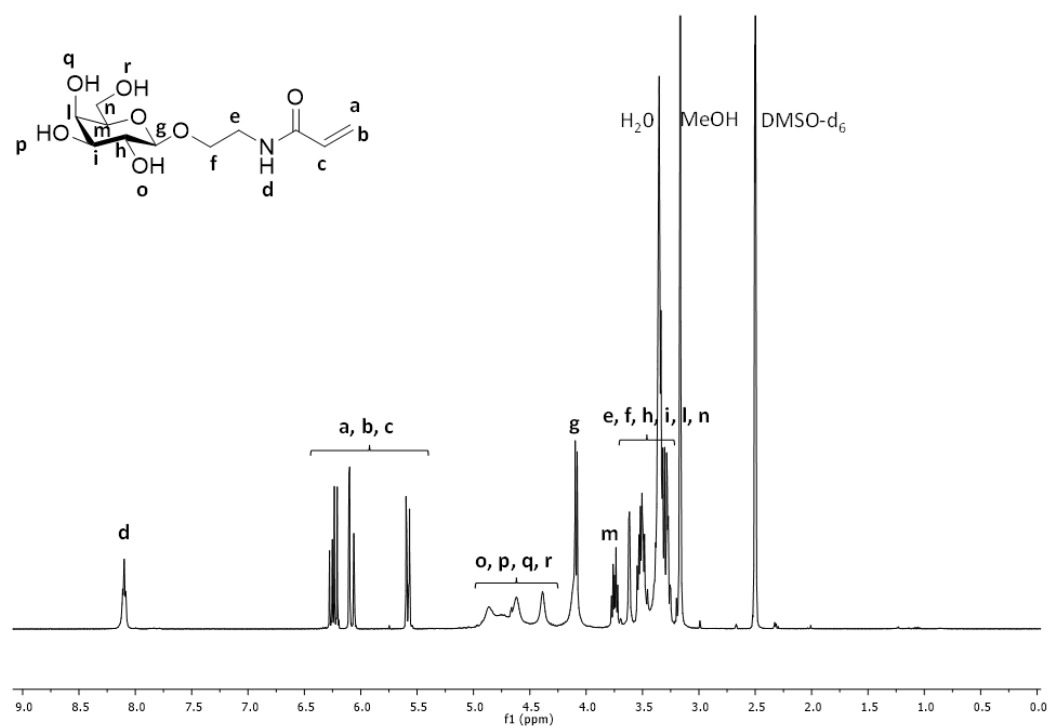

**Figure S7.** <sup>1</sup>H NMR of β-D-galactopyranosyloxyethyl acrylamide (6) in DMSO-*d*<sub>6</sub> after purification.

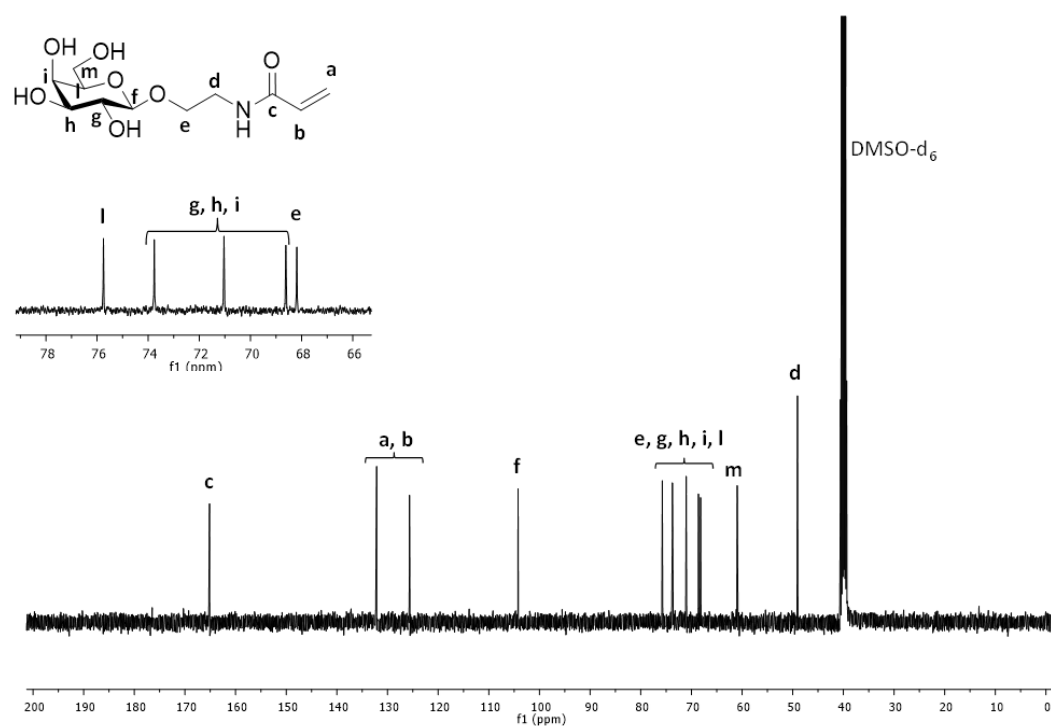

**Figure S8.**  $^{13}\text{C}$  NMR of  $\beta$ -D-galactopyranosyloxyethyl acrylamide (6) in  $\text{DMSO}-d_6$  after purification.

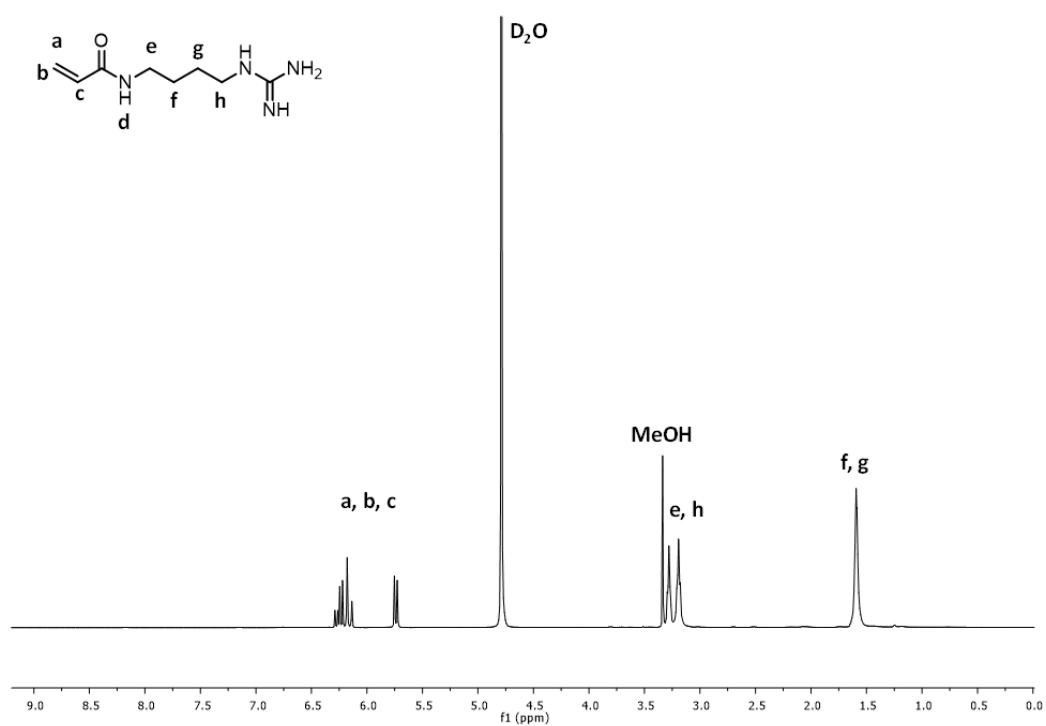

**Figure S9.**  $^1\text{H}$  NMR of agmatine acrylamide (7) in  $\text{D}_2\text{O}$  after purification.

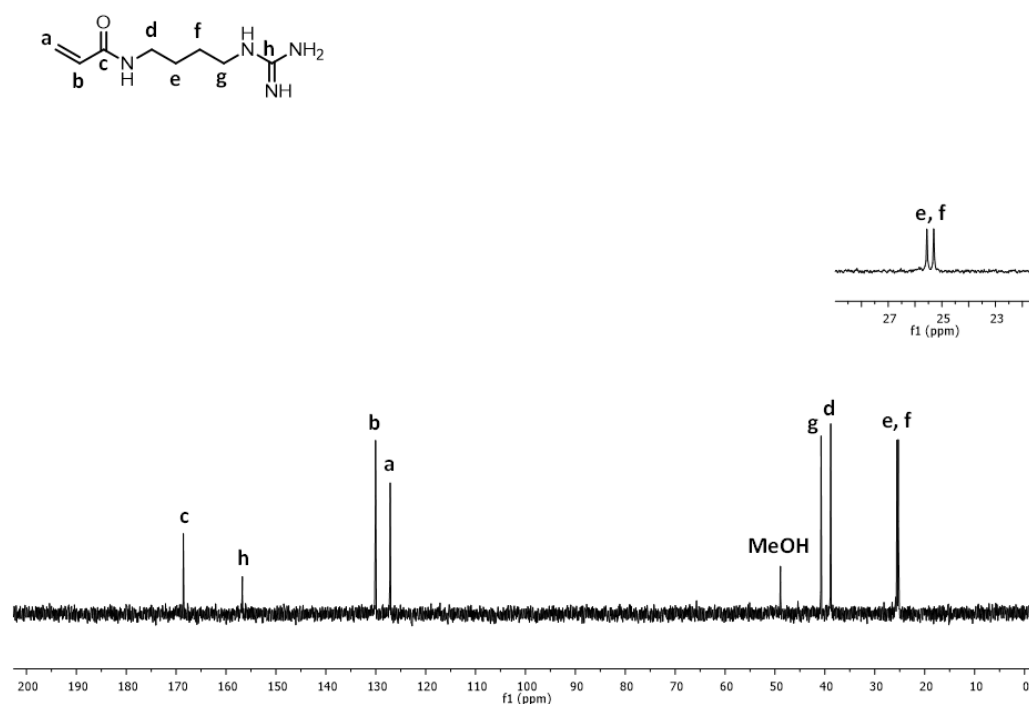

**Figure S10.**  $^{13}\text{C}$  NMR of agmatine acrylamide (7) in  $\text{D}_2\text{O}$  after purification.

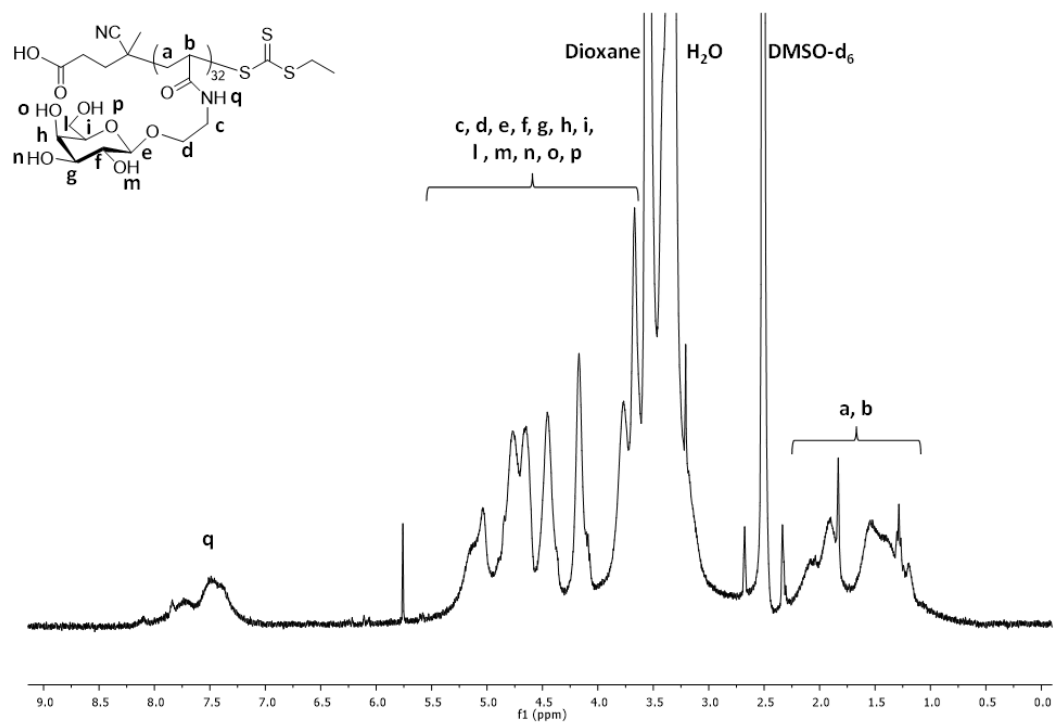

**Figure S11.**  $^1\text{H}$  NMR in  $\text{DMSO-}d_6$  of macro-CTA  $\text{Gal}_{32}$  (8) performed on an aliquot of the polymerisation mixture withdrawn at the end of the first polymerisation step. The intermediate was used for the next polymerisation step without isolation or purification.

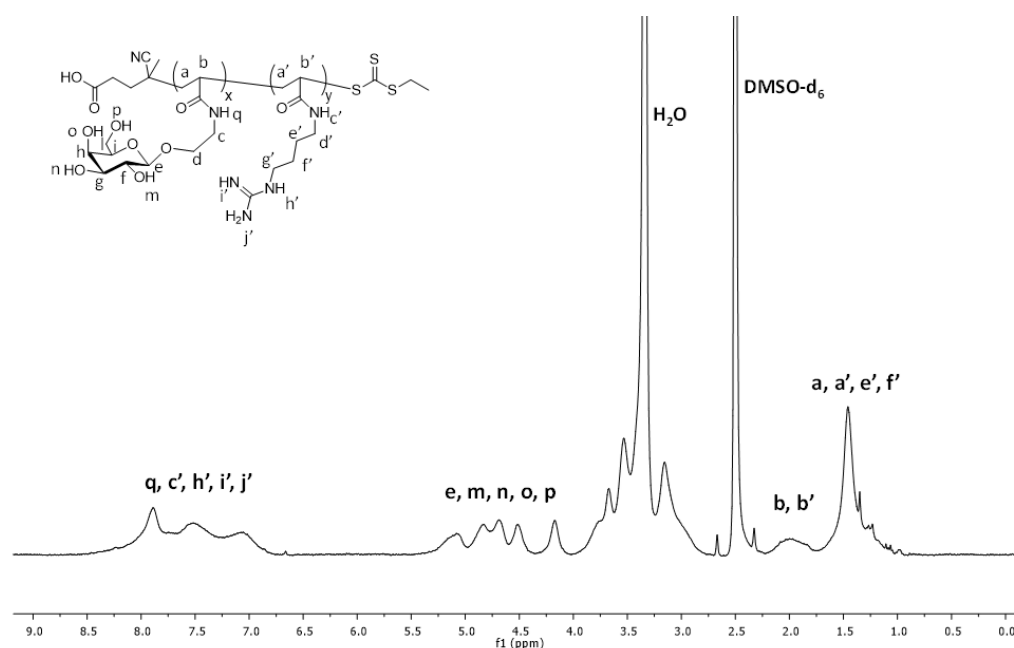

**Figure S12.**  $^1\text{H}$  NMR in  $\text{DMSO-}d_6$  of  $\text{Gal}_{32}\text{-}b\text{-Agm}_{29}$  (9) block copolymer after purification by dialysis.

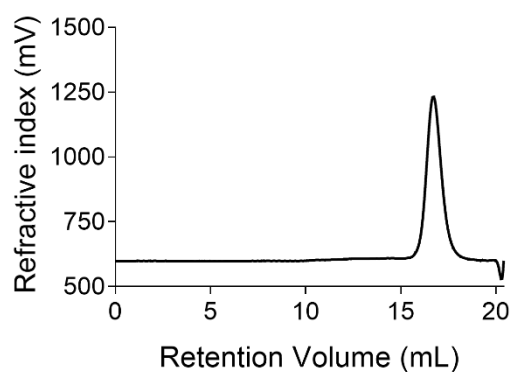

**Figure S13.** Gel permeation chromatography (GPC) profile of  $\text{Gal}_{32}\text{-}b\text{-Agm}_{29}$  (9) block copolymer after purification by dialysis and freeze-drying.

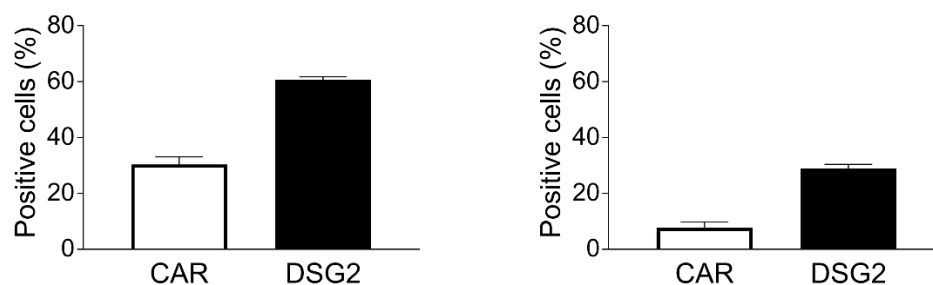

**Figure S14.** HepG2 (left panels) and A549 (right panels): positive cells for CAR and DSG2 were measured via flow cytometry by specific antibody staining.



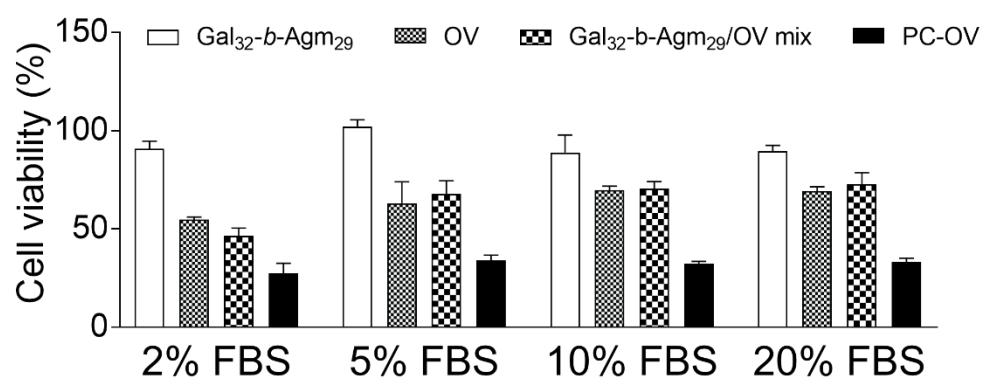

**Figure S15.** In vitro cytotoxicity on HepG2 cells of naked OV, Gal<sub>32</sub>-b-Agm<sub>29</sub> alone, Gal<sub>32</sub>-b-Agm<sub>29</sub>/OV mix and PC-OV measured by MTS cell-viability assay at day 3 post-treatment using FBS increasing % in the culture medium. Control untreated cells were used as reference (100% cell viability).

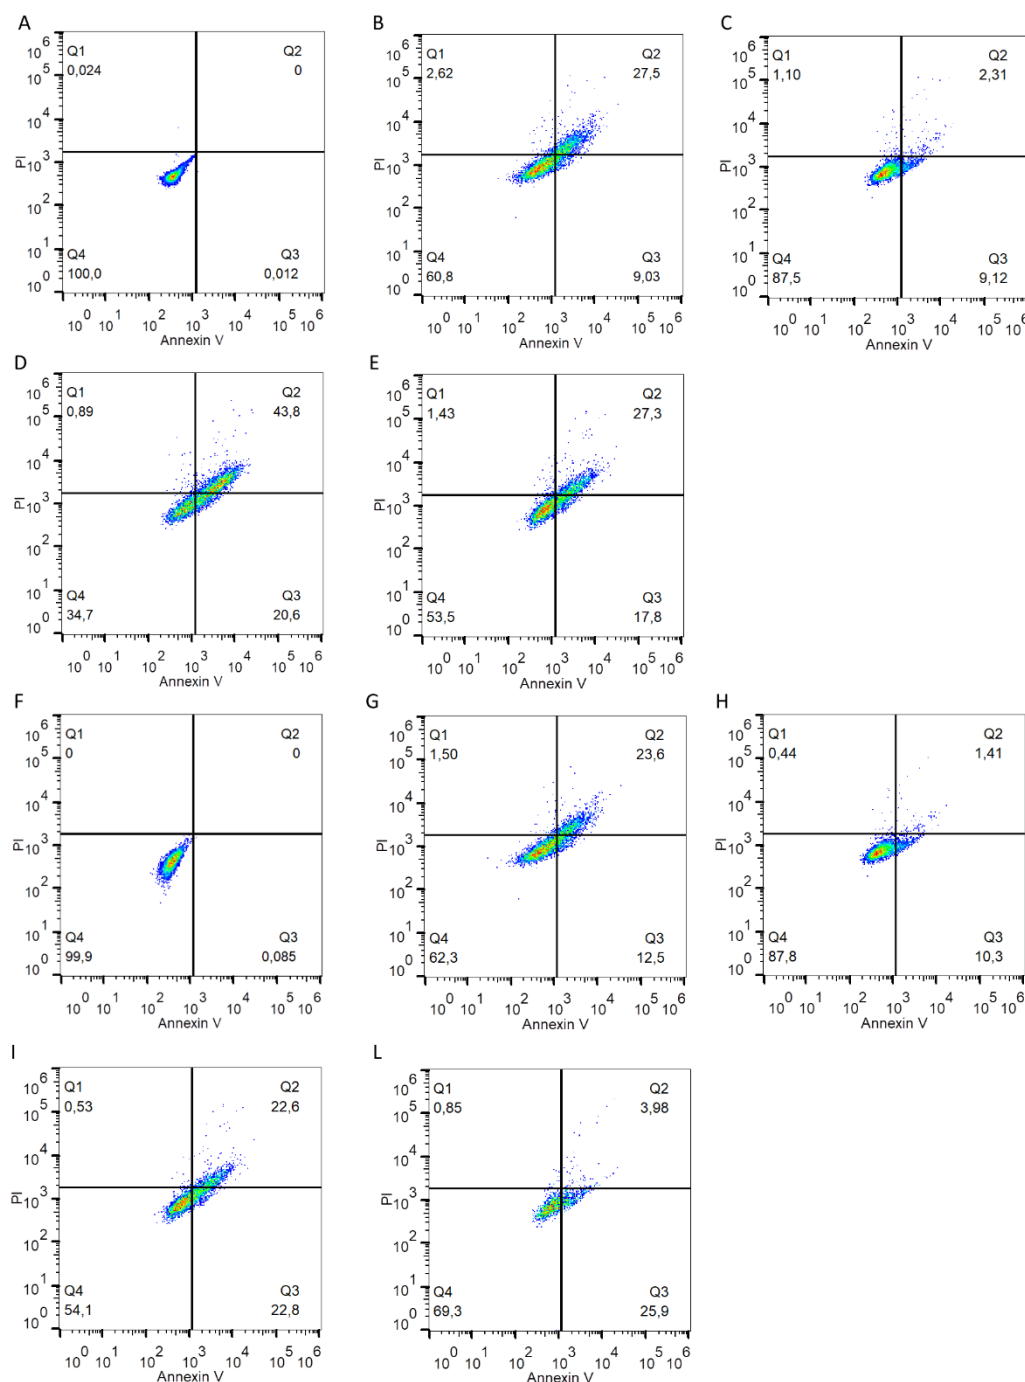

**Figure S16.** Dot plot with percentage of Annexin V/PI positive HepG2 (A–E) or A549 (F–L) cells, after 48 h treatment. Data shown is representative of at least three independent experiments. (A) and (F): control cells; (B) and (G): virus treated cells; (C) and (H): Gal32-b-Agm29 treated cells; (D) and (I): PC-OV treated cells; (E) and (L): Gal32-b-Agm29/OV mix treated cells.

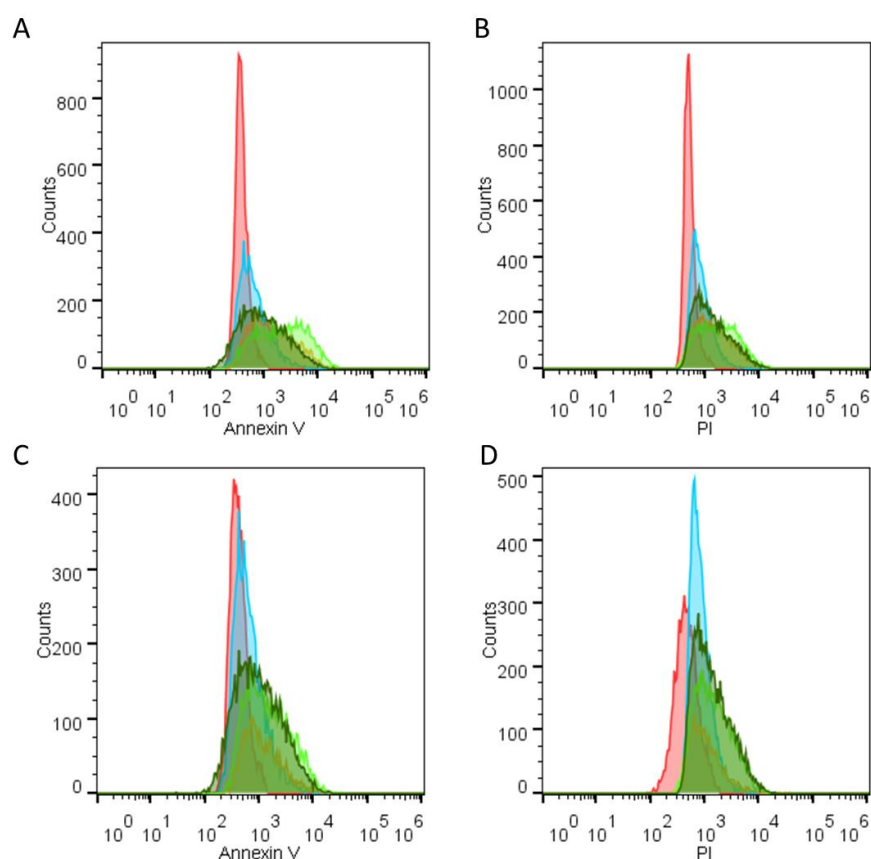

**Figure S17.** Representative flow cytometry analysis data from Annexin V (A,C) / PI (B,D) assay performed on HepG2 (A,B) and A549 (C,D) cells incubated for 48 h with medium only (control cells, red), Gal<sub>32-b</sub>-Agm<sub>29</sub> polymer (light blue), OV alone (dark green), PC-OV (light green), and Gal<sub>32-b</sub>-Agm<sub>29</sub>/OV mix (orange).
